# Supplementary material for: Surface Properties of Poly(Hydroxyurethane)s Based on Five-Membered Bis-Cyclic Carbonate of Diglycidyl Ether of Bisphenol A
Source: PubMed Central journal article supplement (PMC7698458; doi:10.3390/ma13225184), 2020-11-17
Supplement: materials-13-05184-s001.pdf [file materials-13-05184-s001.pdf]

Supplementary materials

# Surface Properties of Poly(Hydroxyurethane)s based on Five-Membered Bis-Cyclic Carbonate of Diglycidyl Ether of Bisphenol A

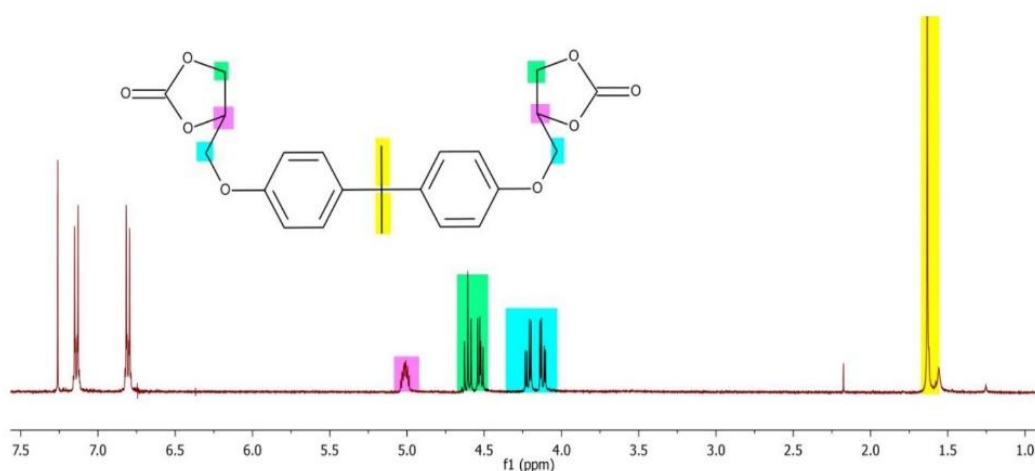

Figure S1. <sup>1</sup>H NMR of monomer.

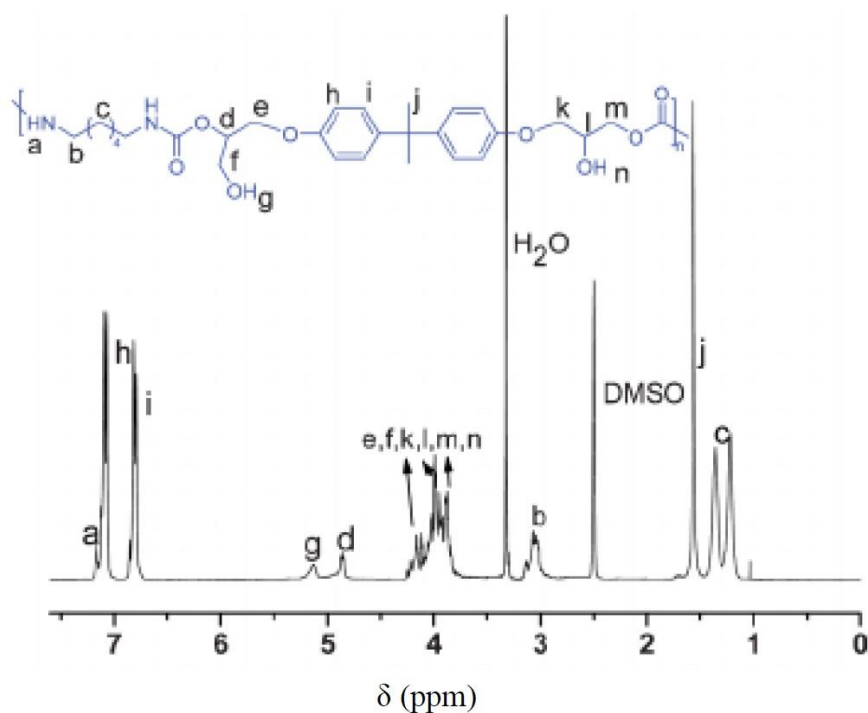

Figure S2. <sup>1</sup>H NMR of PHU compound.

**Table S1.** PHUs structures.

|                                                                                                                                                                                                                                                                                                                                                                                                                                                                                                                                                                                                                                                                                                                                                                                                                                                                                                                  |
|------------------------------------------------------------------------------------------------------------------------------------------------------------------------------------------------------------------------------------------------------------------------------------------------------------------------------------------------------------------------------------------------------------------------------------------------------------------------------------------------------------------------------------------------------------------------------------------------------------------------------------------------------------------------------------------------------------------------------------------------------------------------------------------------------------------------------------------------------------------------------------------------------------------|
| <p><b>PHU-Ar C:</b> <math>^1\text{H}</math> NMR (400 MHz, <math>\text{DMSO-d}_6</math>); <math>\delta</math> (ppm) = 7.82–7.71 (m, 2H), 7.11 (d, <math>J = 8.3</math> Hz, 4H), 6.83 (d, <math>J = 8.2</math>, 4H), 7.05 (d, <math>J = 8.4</math> Hz, 2H), 6.76 (m, 1H), 6.70 (s, 1H), 5.27–5.20 (m, 1H), 5.00–4.85, (m, 1H), 4.10–3.82 (m, 10H), 3.60 (d, <math>J = 8.3</math> Hz, 4H), 1.57 (s, 6H). <math>^{13}\text{C}</math> NMR (100 MHz, <math>\text{DMSO-d}_6</math>); <math>\delta</math> (ppm) = 156.3 (<math>\text{C}=\text{O}</math>), 142.8, 128.3, 127.5, 125.8, 125.6, 125.0, 113.9, 72.8, 69.2, 67.3, 65.3, 59.8 (<math>\text{CH}_2\text{O}</math> and <math>\text{CHO}</math>), 55.0, 43.8, 40.4 (<math>\text{CH}_2\text{NH}</math>), 30.8; FT-IR (ATR) <math>\nu</math> (<math>\text{cm}^{-1}</math>) 3330, 2963, 1695, 1607, 1506, 1457, 1361, 1226, 1181, 1130, 1036, 949, 828, 773, 555;</p> |
| <p><b>PHU-C6O2 22:</b> <math>^1\text{H}</math> NMR (400 MHz, <math>\text{DMSO-d}_6</math>); <math>\delta</math> (ppm) = 7.24–7.14 (m, 2H), 7.08 (d, <math>J = 8.3</math> Hz, 4H), 6.81 (d, <math>J = 8.5</math> Hz, 4H), 5.27–5.22 (m, 1H), 4.99–4.81 (m, 1H), 4.05–3.82 (m, 10H), 3.55–3.44 (m, 4H), 3.10–3.05 (m, 4H), 2.66–2.60 (m, 4H), 1.54 (s, 6H). <math>^{13}\text{C}</math> NMR (100 MHz, <math>\text{DMSO-d}_6</math>); <math>\delta</math> (ppm) = 156.3, 142.7, 127.5, 113.9, 72.7, 69.5, 69.2, 67.3, 66.5, 66.2, 65.2, 59.8, 54.9, 41.2, 40.4, 30.8, 29.8; FT-IR (ATR) <math>\nu</math> (<math>\text{cm}^{-1}</math>) 3330, 2929, 2870, 1697, 1607, 1507, 1459, 1361, 1231, 1182, 1102, 1036, 827, 773, 555;</p>                                                                                                                                                                                    |
| <p><b>PHU-C10O3 21:</b> <math>^1\text{H}</math> NMR (400 MHz, <math>\text{DMSO-d}_6</math>); <math>\delta</math> (ppm) = 7.24–7.16 (m, 2H), 7.06 (d, <math>J = 8.3</math> Hz, 4H), 6.82 (d, <math>J = 8.5</math> Hz, 4H), 5.26–5.21 (m, 1H), 4.98–4.81 (m, 1H), 4.06–3.83 (m, 10H), 3.68–3.50 (m, 8H), 3.58–3.44 (m, 4H), 3.07–3.00 (m, 4H), 2.56–2.48 (m, 4H), 1.54 (s, 6H). <math>^{13}\text{C}</math> NMR (100 MHz, <math>\text{DMSO-d}_6</math>); <math>\delta</math> (ppm) = 156.3, 142.7, 127.4, 113.9, 72.7, 69.5, 69.2, 67.2, 66.6, 66.1, 65.20, 59.7, 55.0, 41.2, 40.3, 30.8, 29.9; FT-IR (ATR) <math>\nu</math> (<math>\text{cm}^{-1}</math>) 3336, 2921, 34, 2870, 1695, 1607, 1507, 1457, 1361, 1234, 1182, 1039, 876, 828, 774, 555;</p>                                                                                                                                                            |
| <p><b>PHU-CC6 11:</b> <math>^1\text{H}</math> NMR (400 MHz, <math>\text{DMSO-d}_6</math>); <math>\delta</math> (ppm) = 7.23–7.13 (m, 4H), 7.08 (d, <math>J = 8.4</math> Hz, 4H), 6.80 (d, <math>J = 8.2</math> Hz, 4H), 5.26–5.19 (m, 1H), 4.97–4.82 (m, 1H), 4.08–3.83 (m, 10H), 3.04–2.92 (m, 3H), 1.56 (s, 6H), 1.43 (d, <math>J = 13.2</math> Hz, 2H), 1.30 (d, <math>J = 13.1</math> Hz, 2H), 1.15 (d, <math>J = 12.0</math> Hz, 3H), 1.10–1.00 (m, 2H), 0.99–0.89 (m, 1H), 0.84 (s, 3H); <math>^{13}\text{C}</math> NMR (100 MHz, <math>\text{DMSO-d}_6</math>); <math>\delta</math> (ppm) = 156.3, 142.7, 127.5, 113.9, 72.4, 69.2, 67.3, 65.1, 59.8, 54.4, 41.4, 41.2, 40.4, 35.0, 31.4, 30.8, 29.9, 27.5, 27.0, 23.2, 20.0; FT-IR (ATR) <math>\nu</math> (<math>\text{cm}^{-1}</math>) 3334, 2954, 1698, 1607, 1507, 1460, 1385, 1362, 1229, 1181, 1032, 827, 772, 557.</p>                             |
